# Supplementary material
Source: PubMed Central journal article supplement (PMC6348558)

## Six months on - NHS England needs to focus on dissemination, implementation and audit of its Low Priority Initiative.

---

Alex J Walker, Seb Bacon, Helen Curtis, Richard Croker, Brian MacKenna, Ben Goldacre

Here we describe the prescribing of 17 treatments considered by NHS England to be low-priority, for each month between January 2013 and June 2018. The NHS England low-priority consultation was started in July 2017, and the report resulting from the consultation was published in November 2017. We are therefore interested to see how prescribing changed following either of these dates.

The following figures (1-18) show prescribing for all treatments combined, then for each of the 17 treatments individually. The top graph shows the total number of items prescribed by GPs in England, for each treatment. The bottom graph shows deciles (10-90th) and extreme percentiles (1-9th and 91-99th) for the number of items prescribed by each CCG.

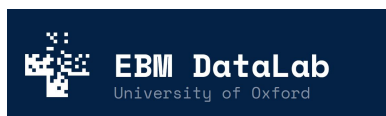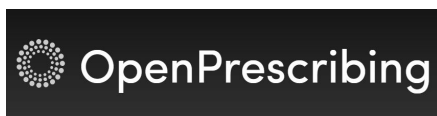

[feedback@openprescribing.net](mailto:feedback@openprescribing.net) | [www.ebmdatalab.net](http://www.ebmdatalab.net) | [@ebmdatalab](https://twitter.com/ebmdatalab)

**EBM DataLab | Centre for Evidence-Based Medicine**

Nuffield Department of Primary Care Health Sciences, University of Oxford  
Radcliffe Observatory Quarter, Woodstock Road, Oxford, OX2 6GG

## [1] Total items in England

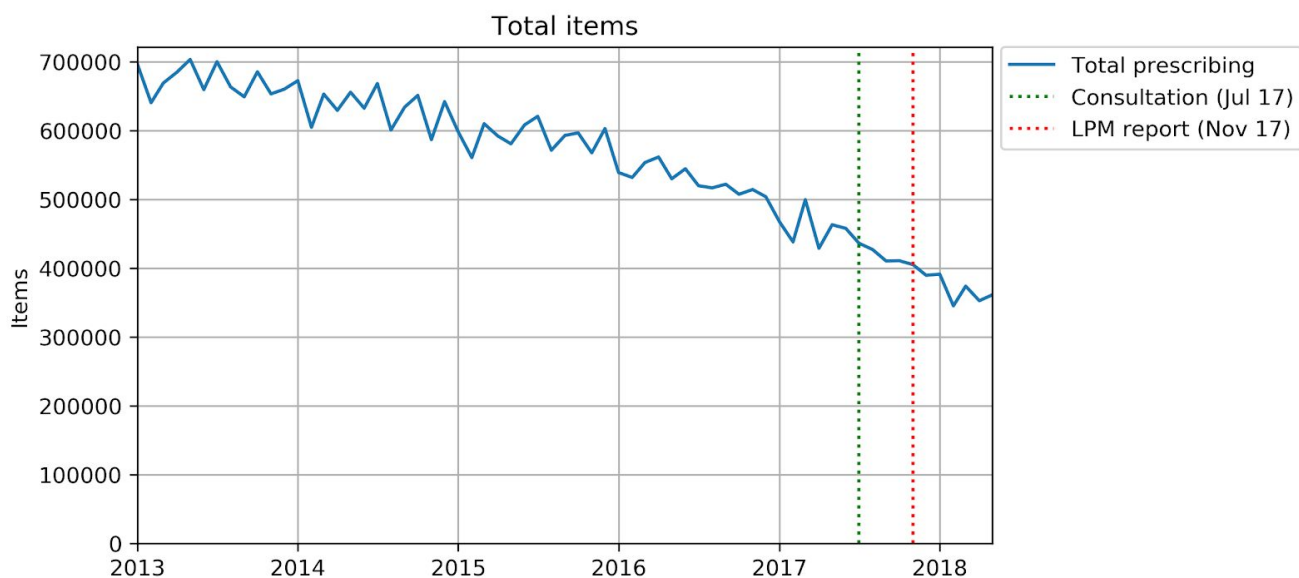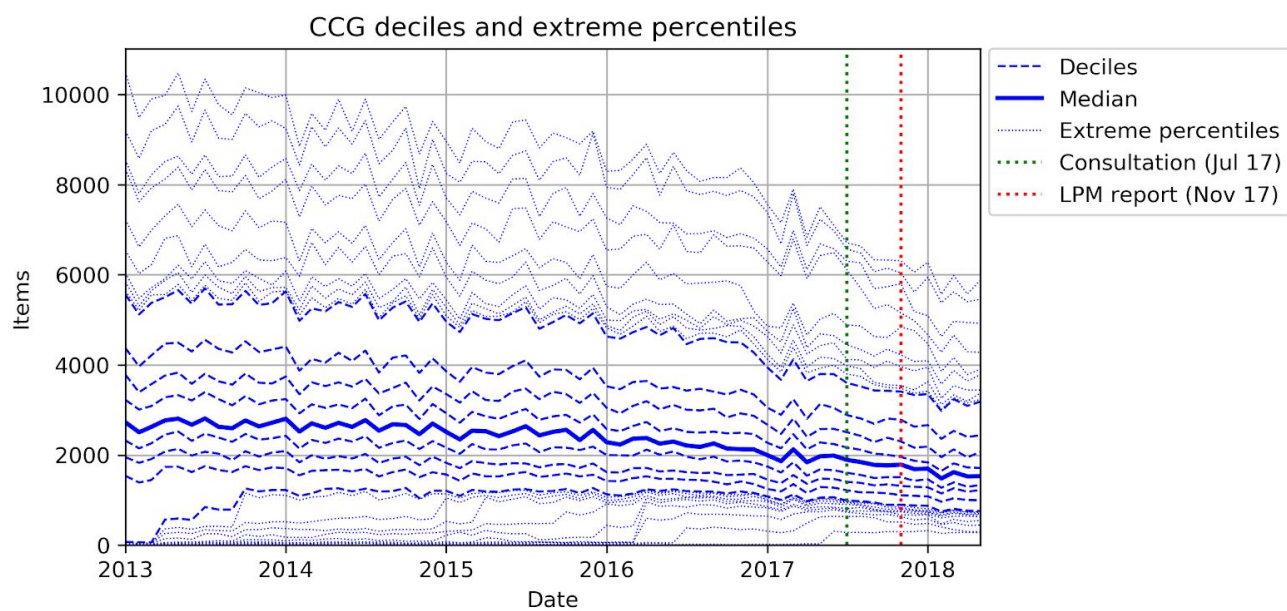

## [2] Co-proxamol items in England

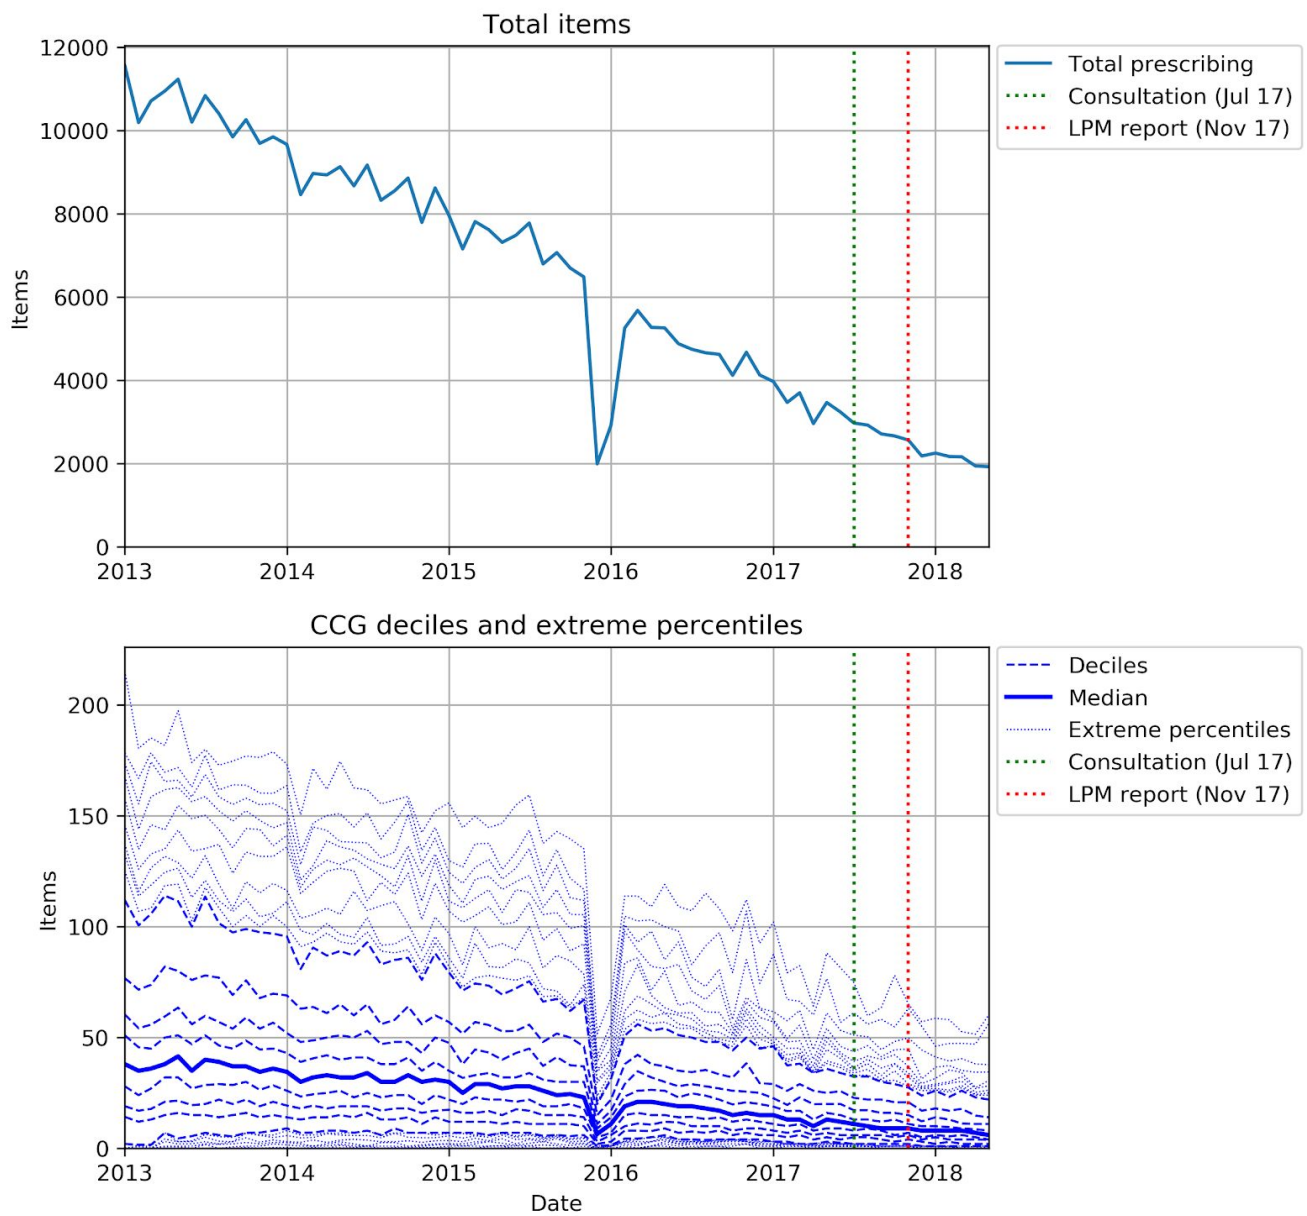

### [3] Dosulepin items in England

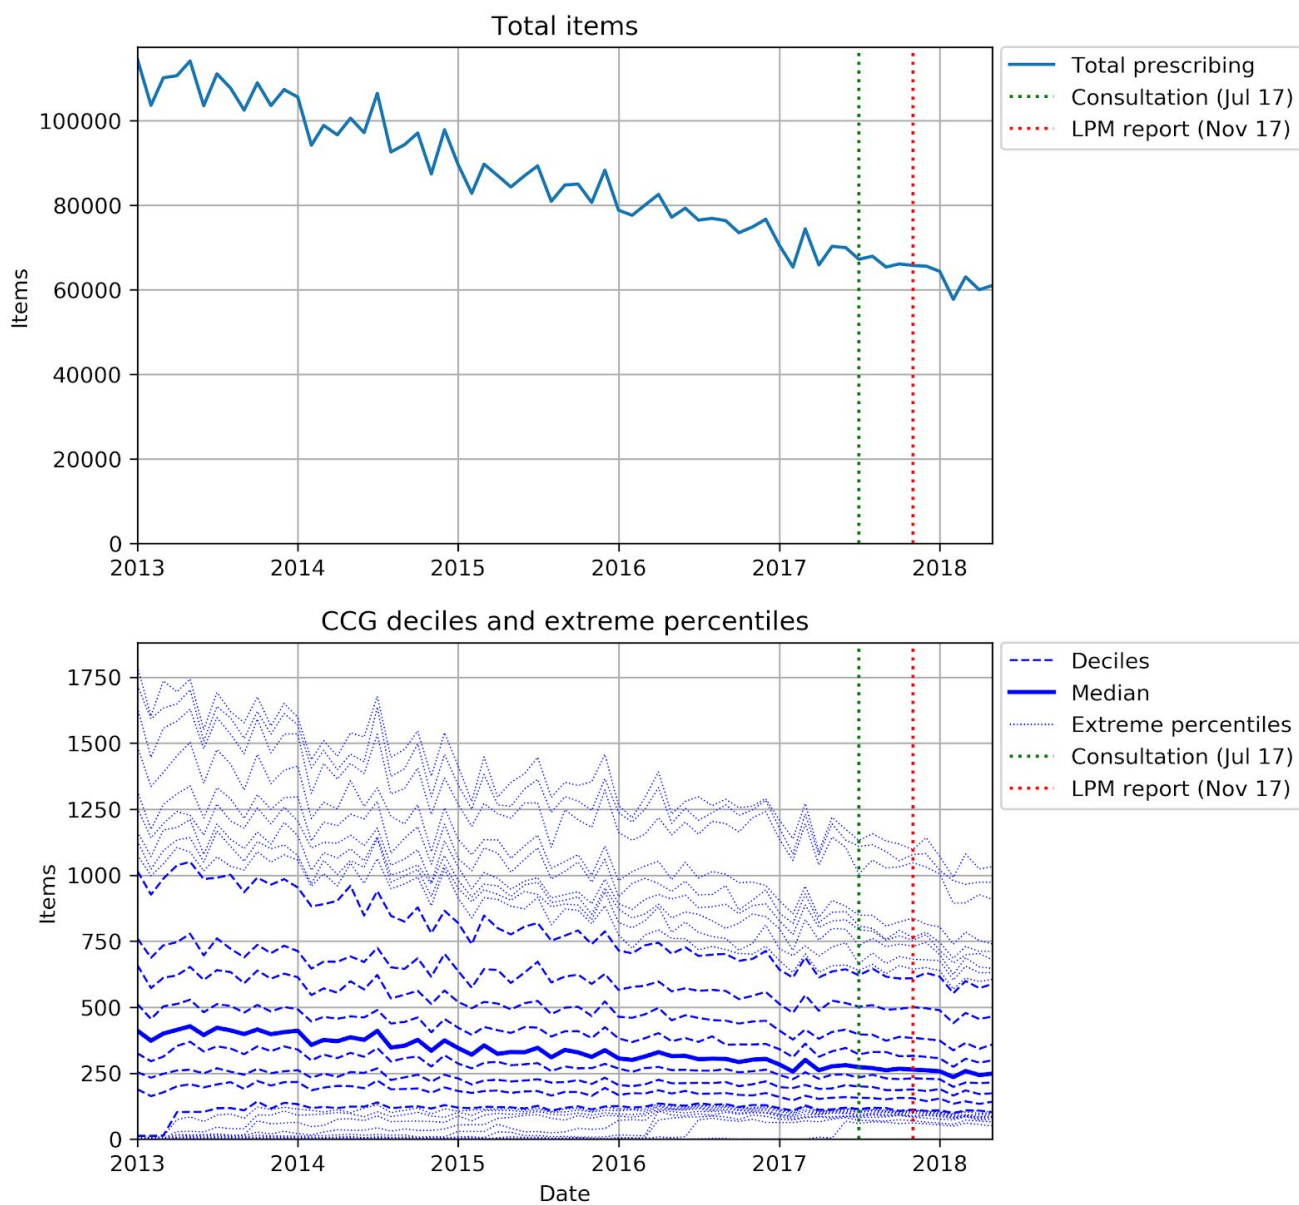

#### [4] Doxazosin modified release items in England

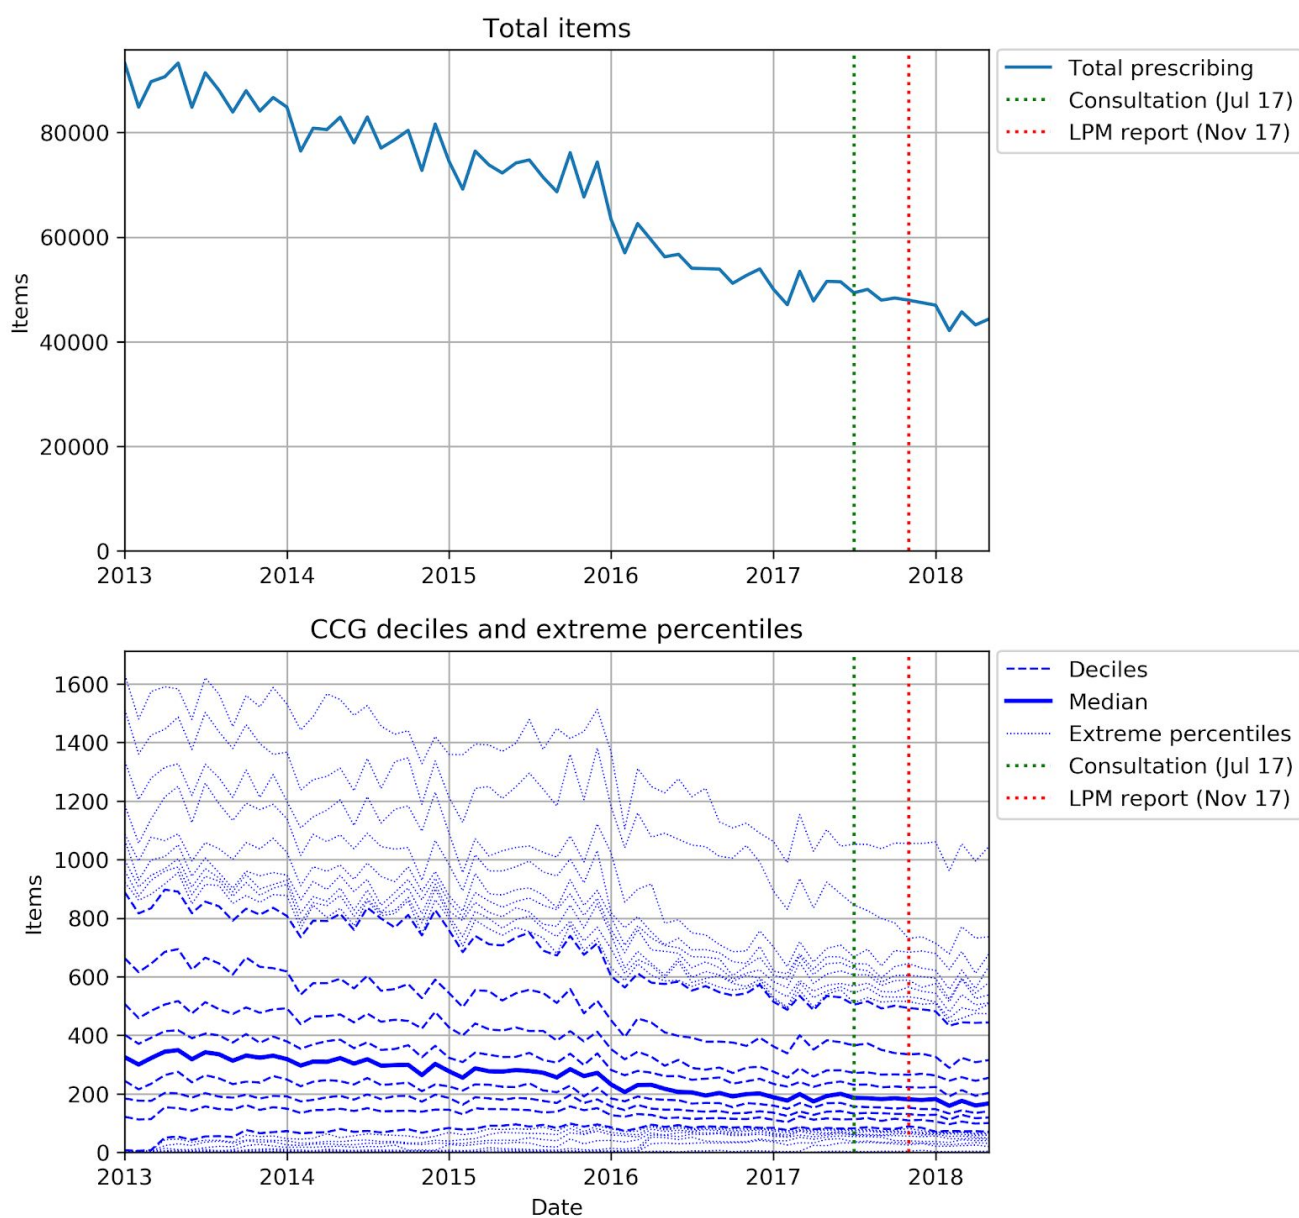

## [5] Fentanyl immediate release items in England

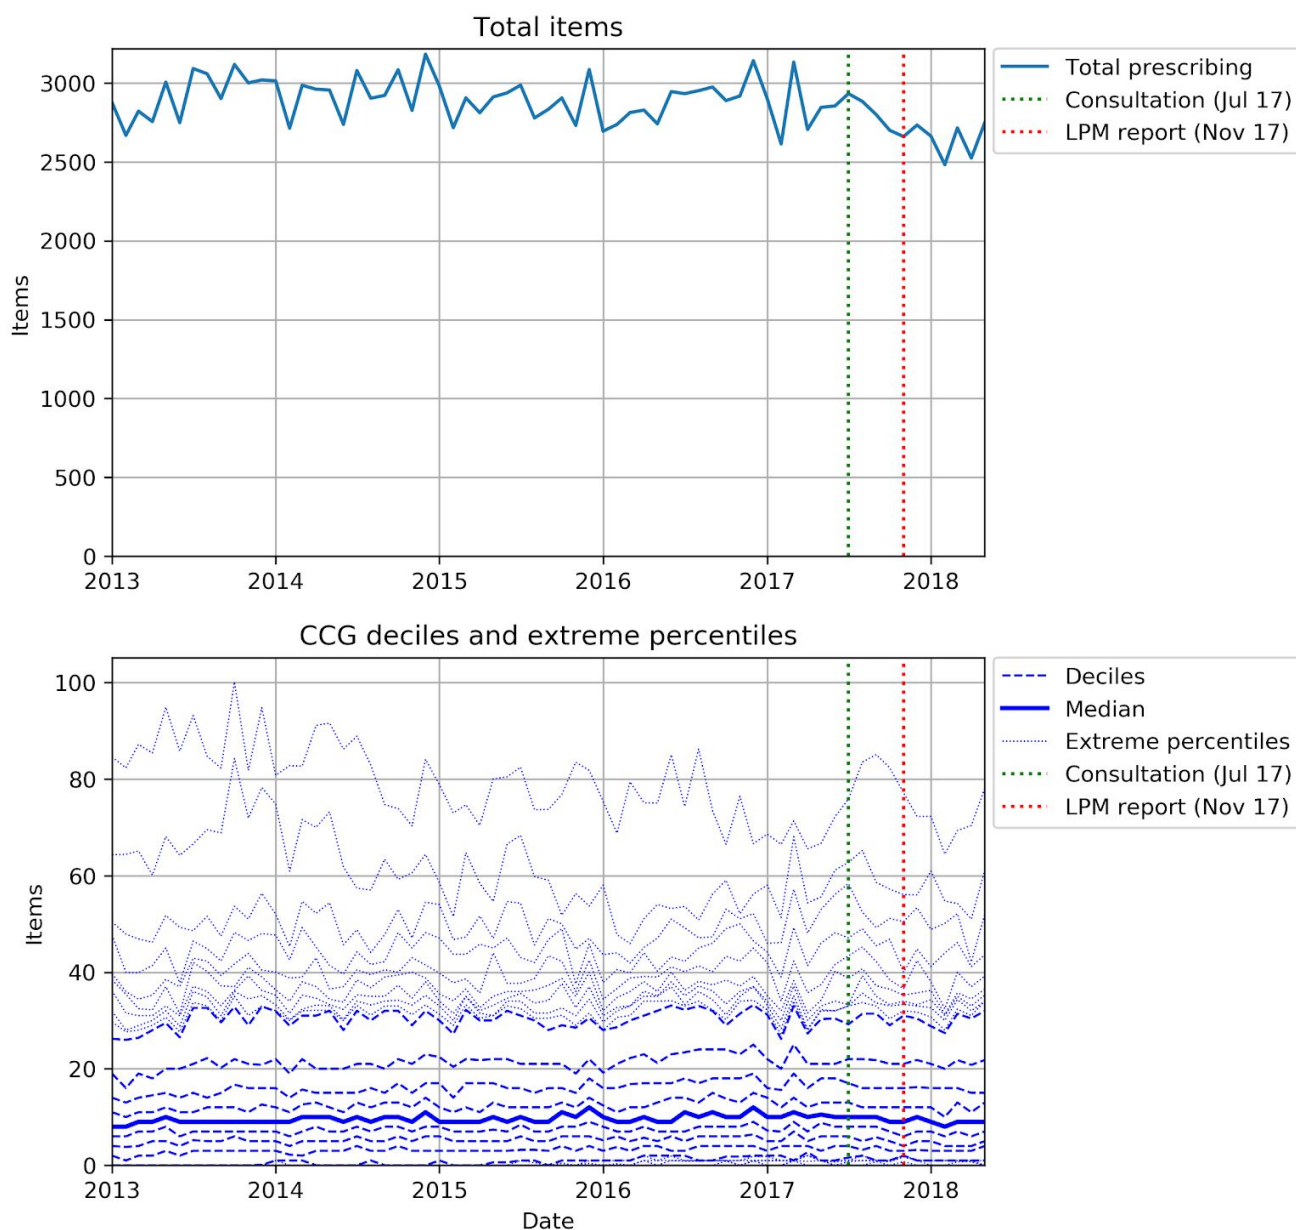

## [6] Glucosamine and chondroitin items in England

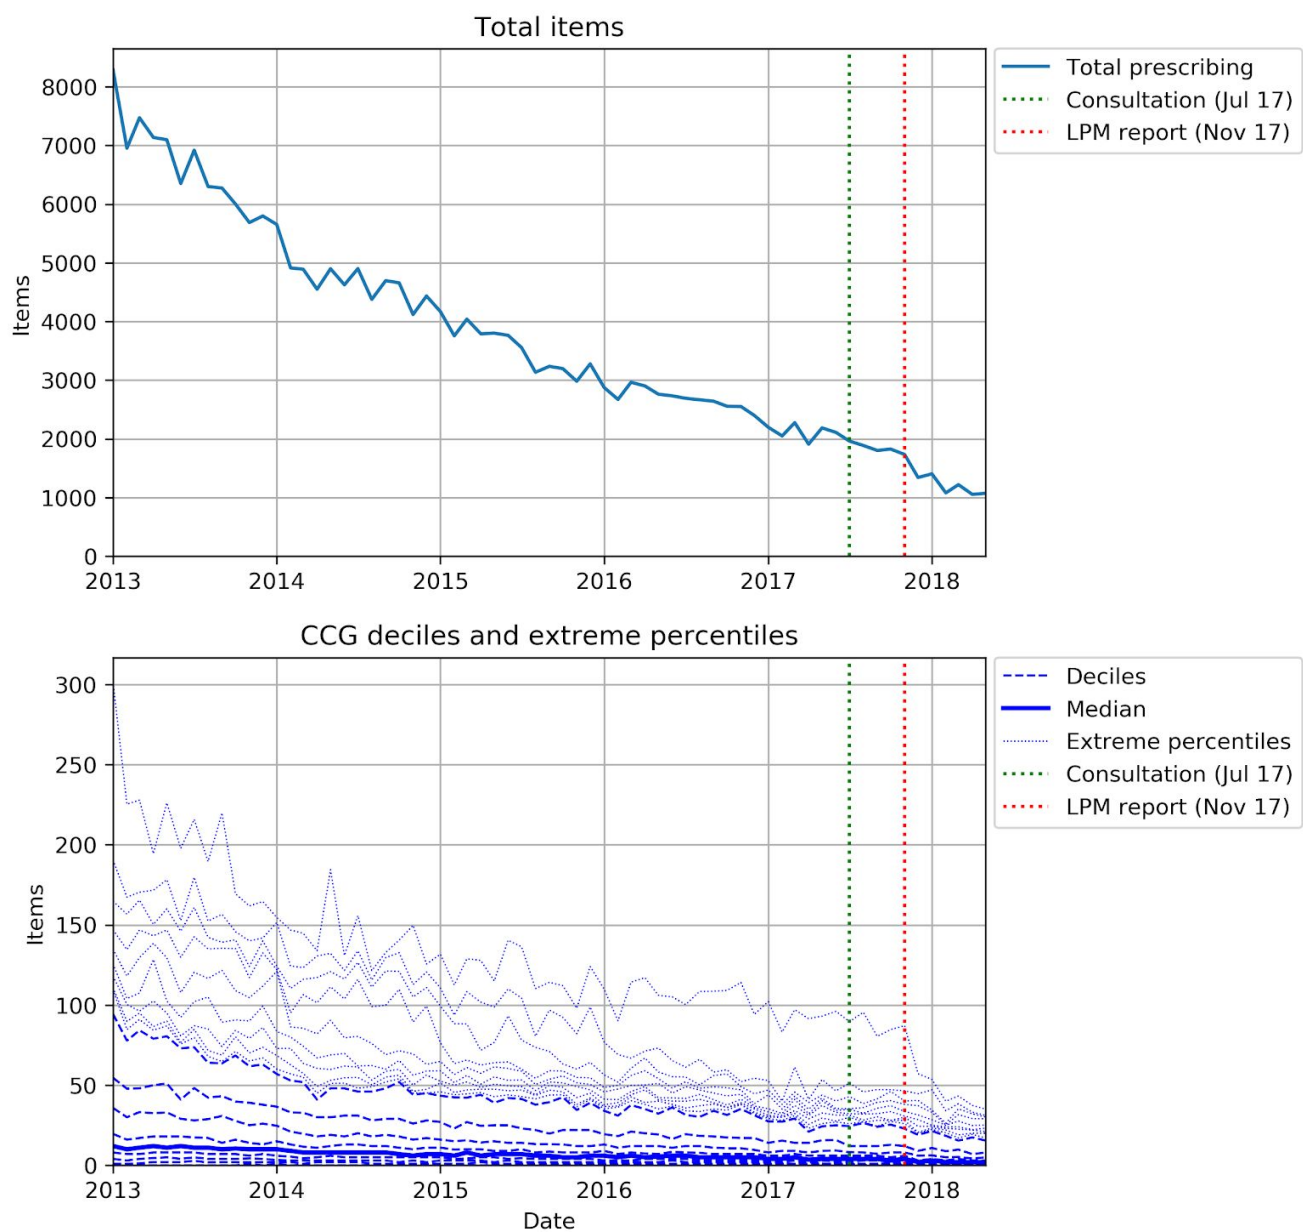

## [7] Homeopathy items in England

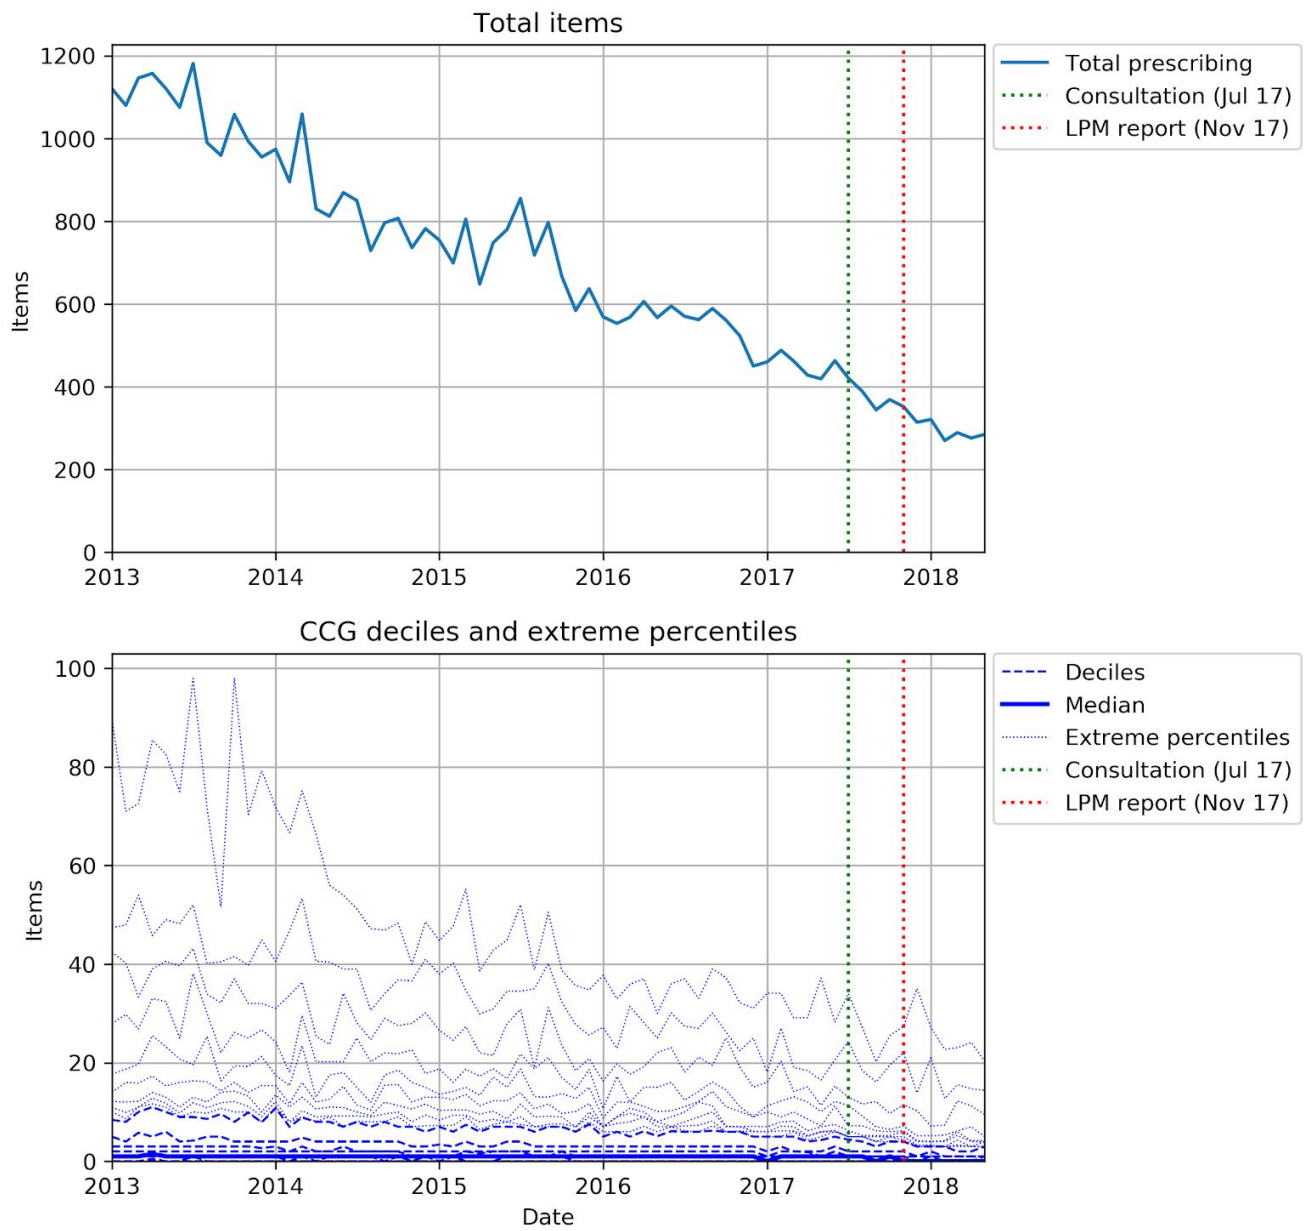

## [8] Lidocaine plasters items in England

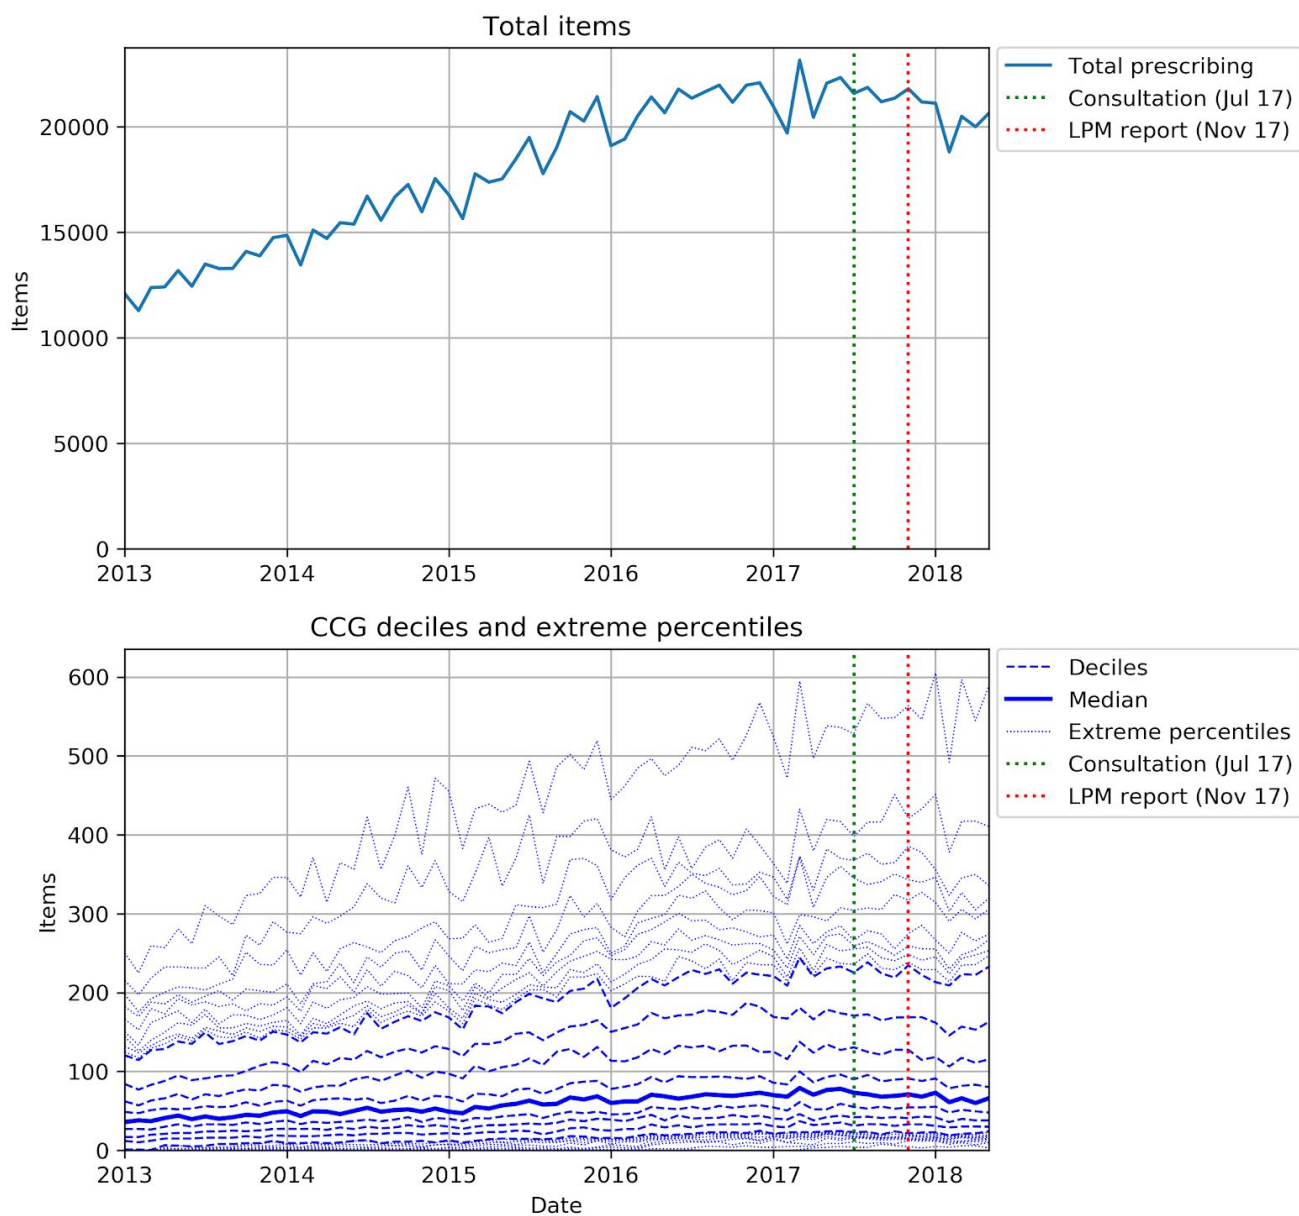

## [9] Liothyronine items in England

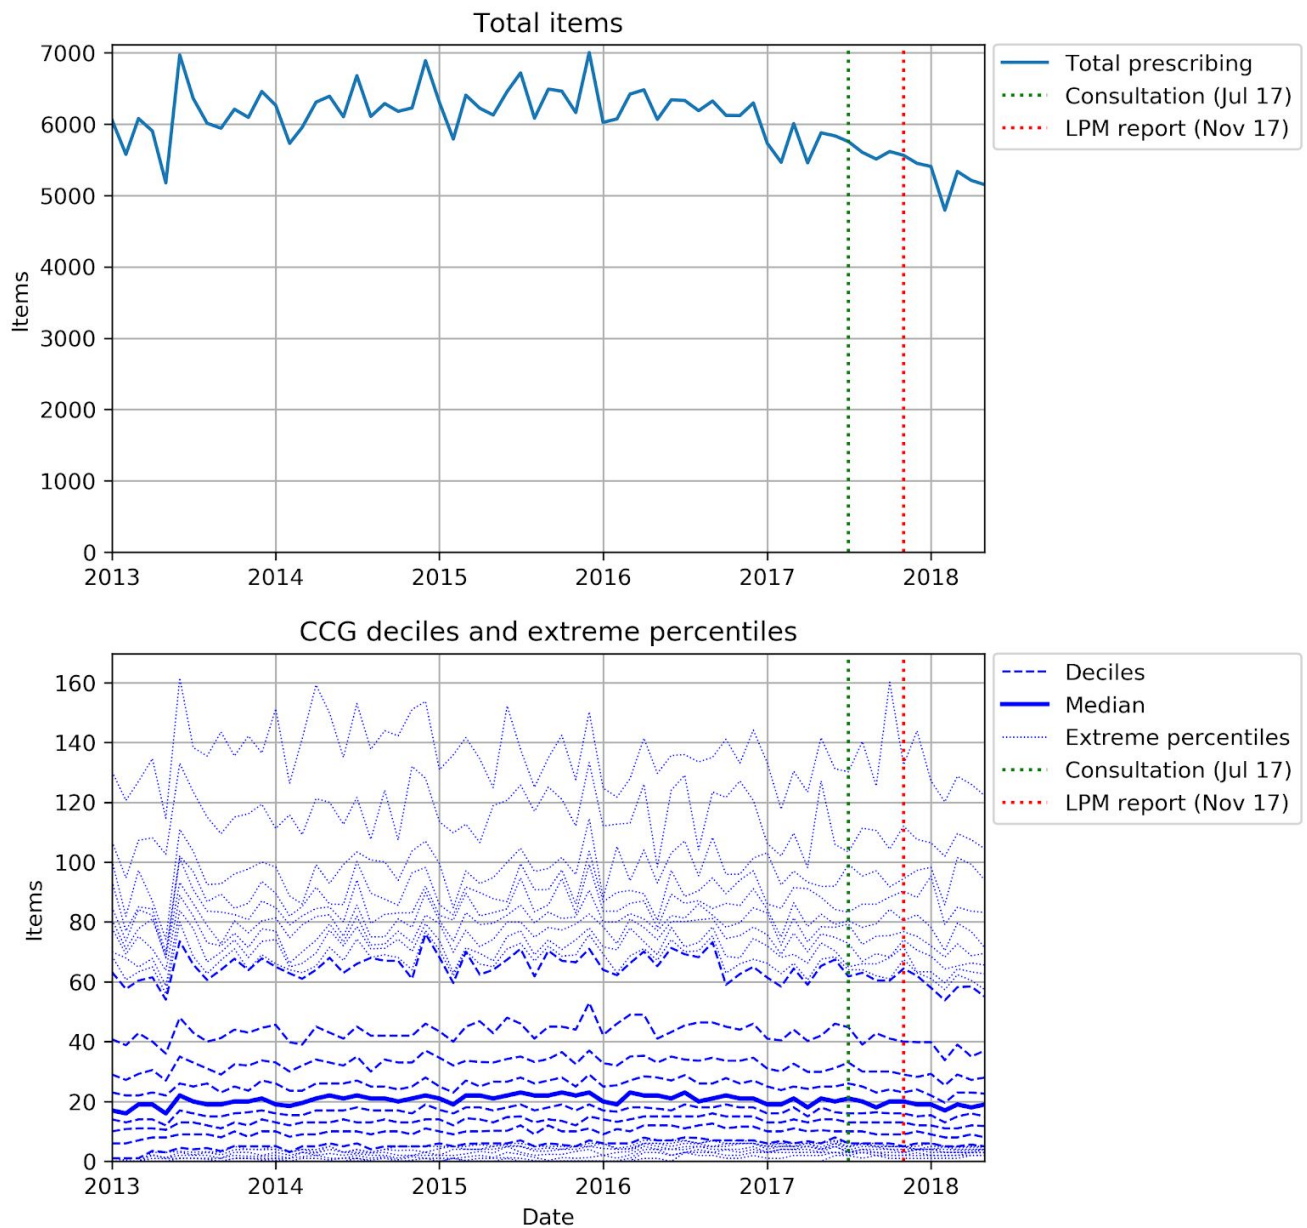

## [10] Lutein and antioxidants items in England

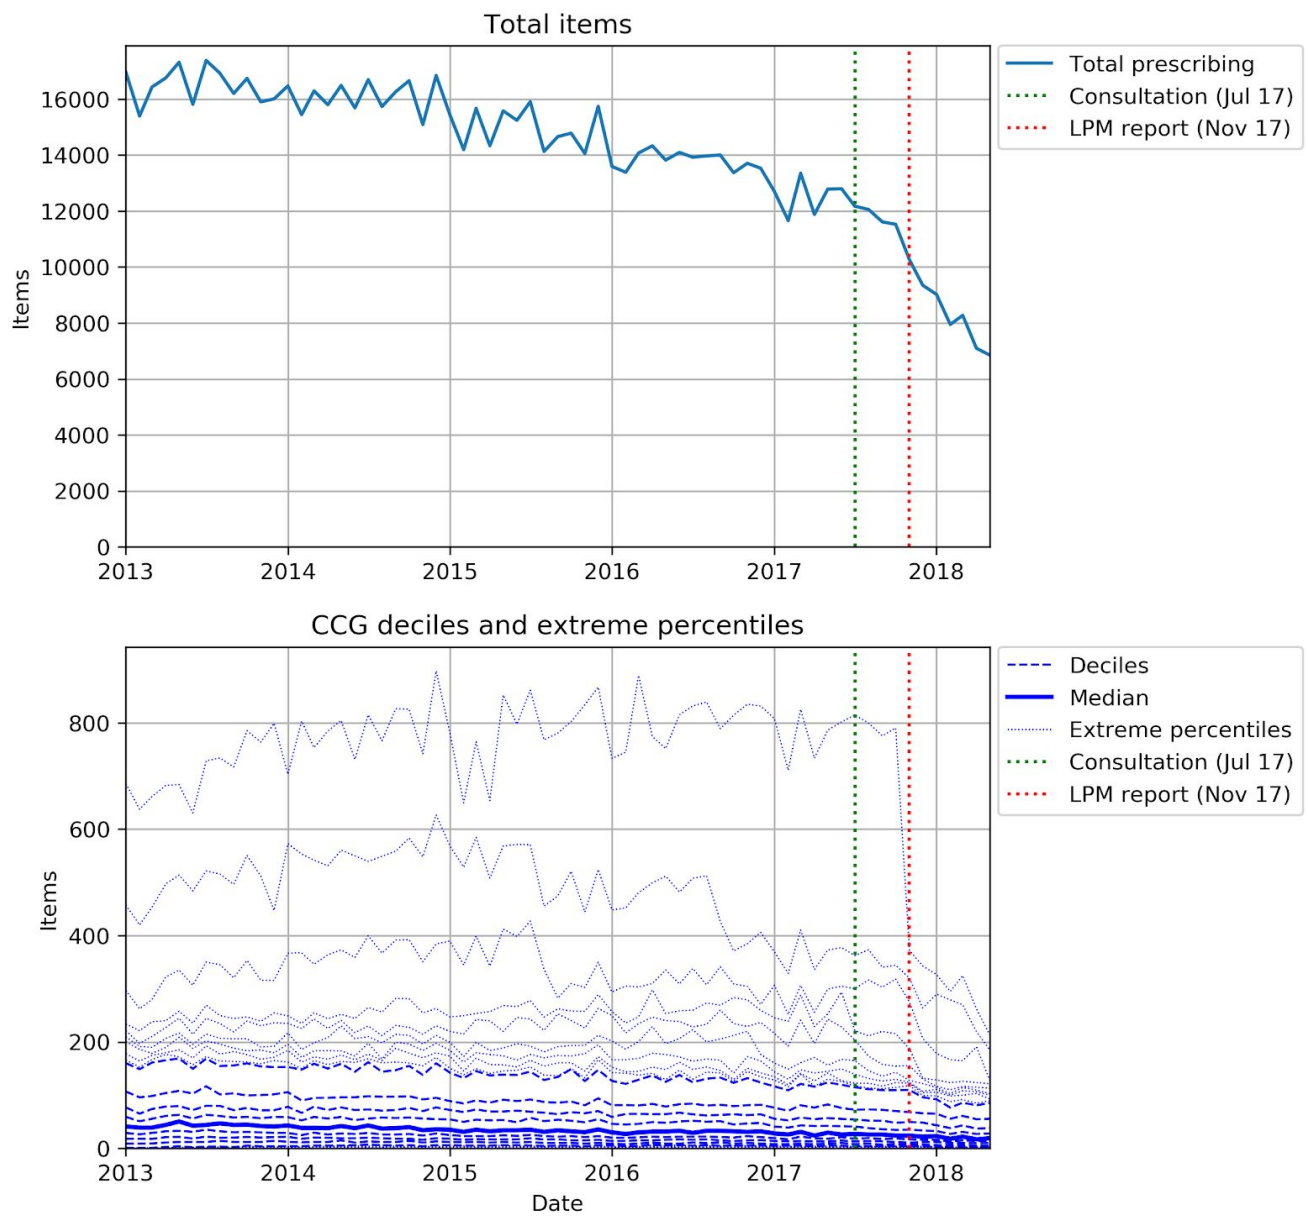

## [11] Omega-3 fatty acid compounds items in England

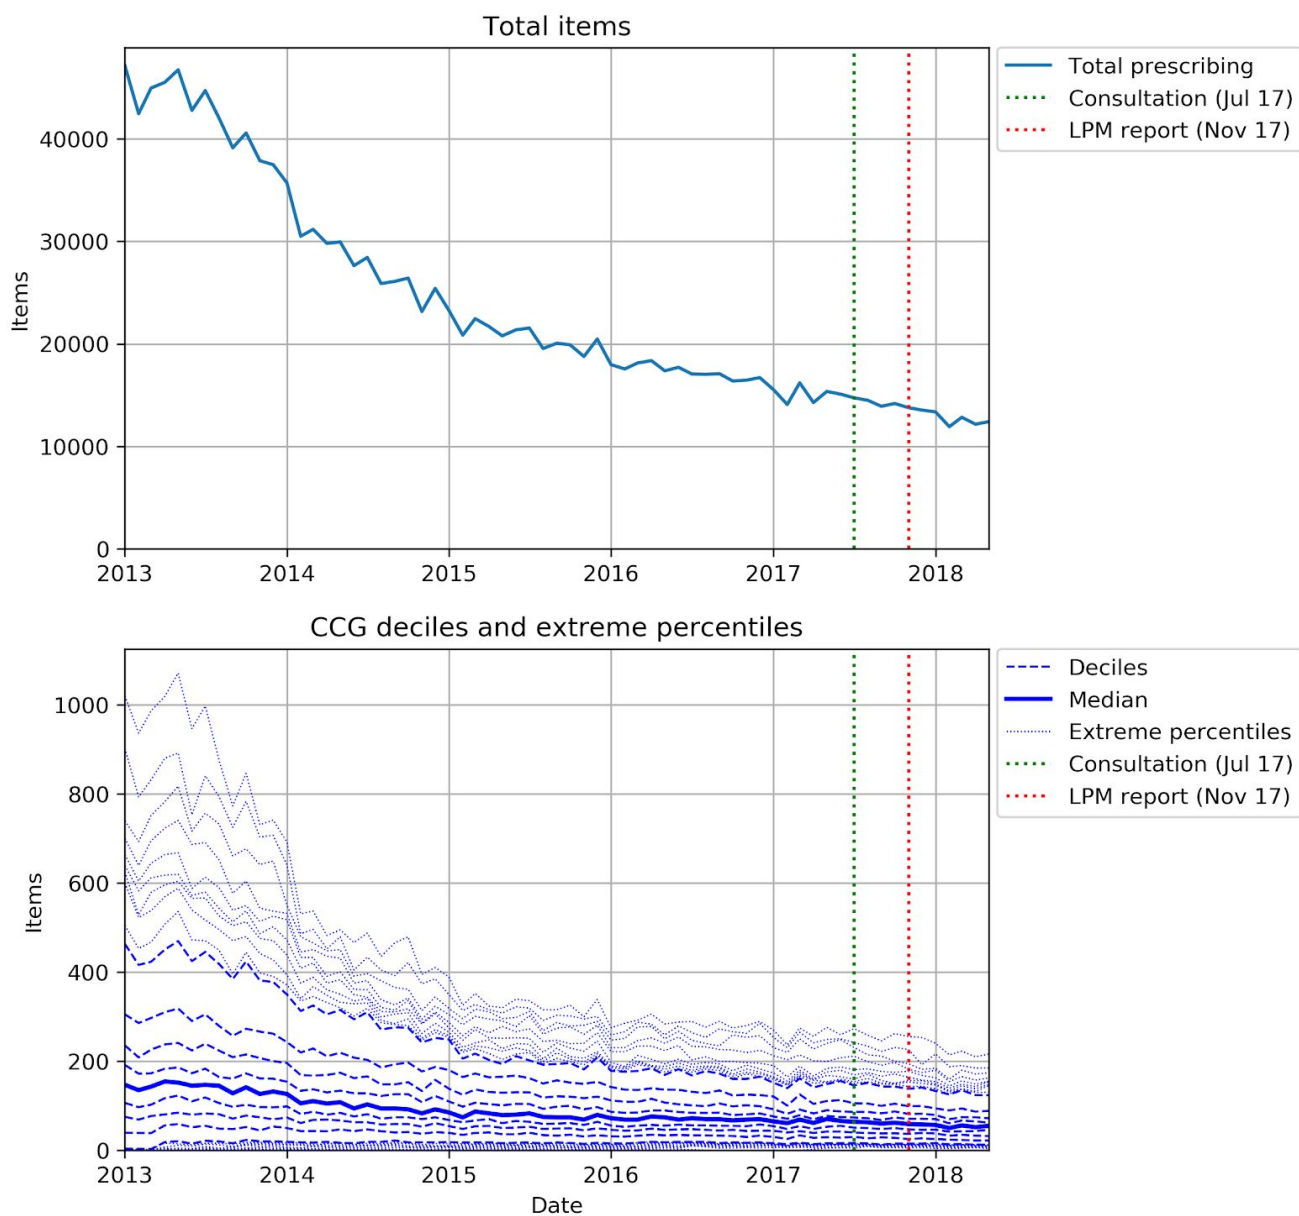

## [12] Oxycodone and naloxone combination product items in England

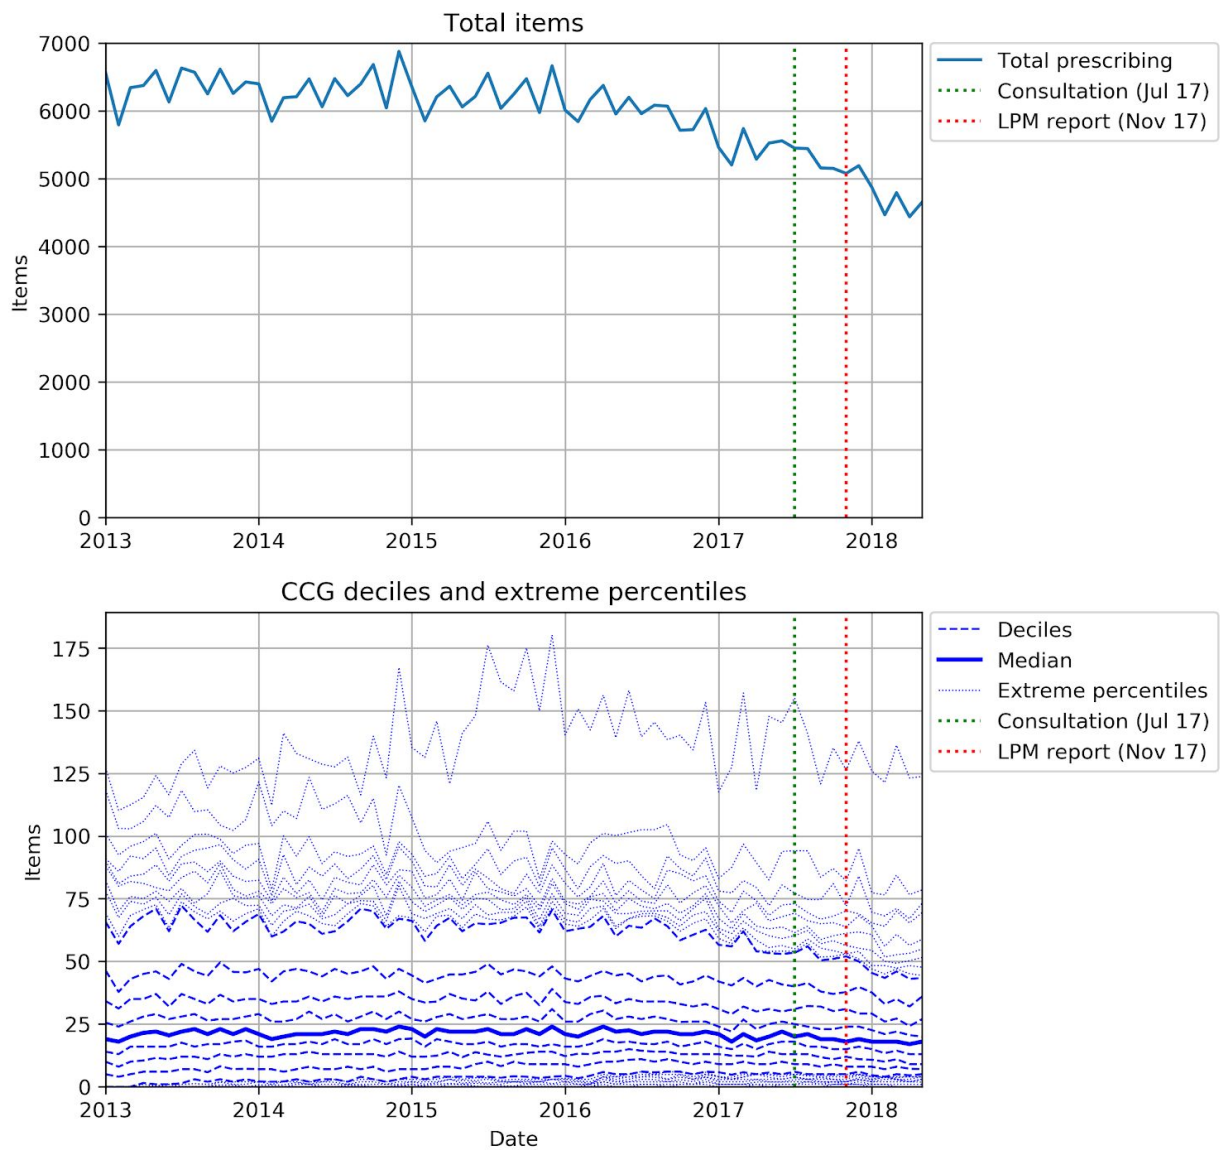

### [13] Perindopril arginine items in England

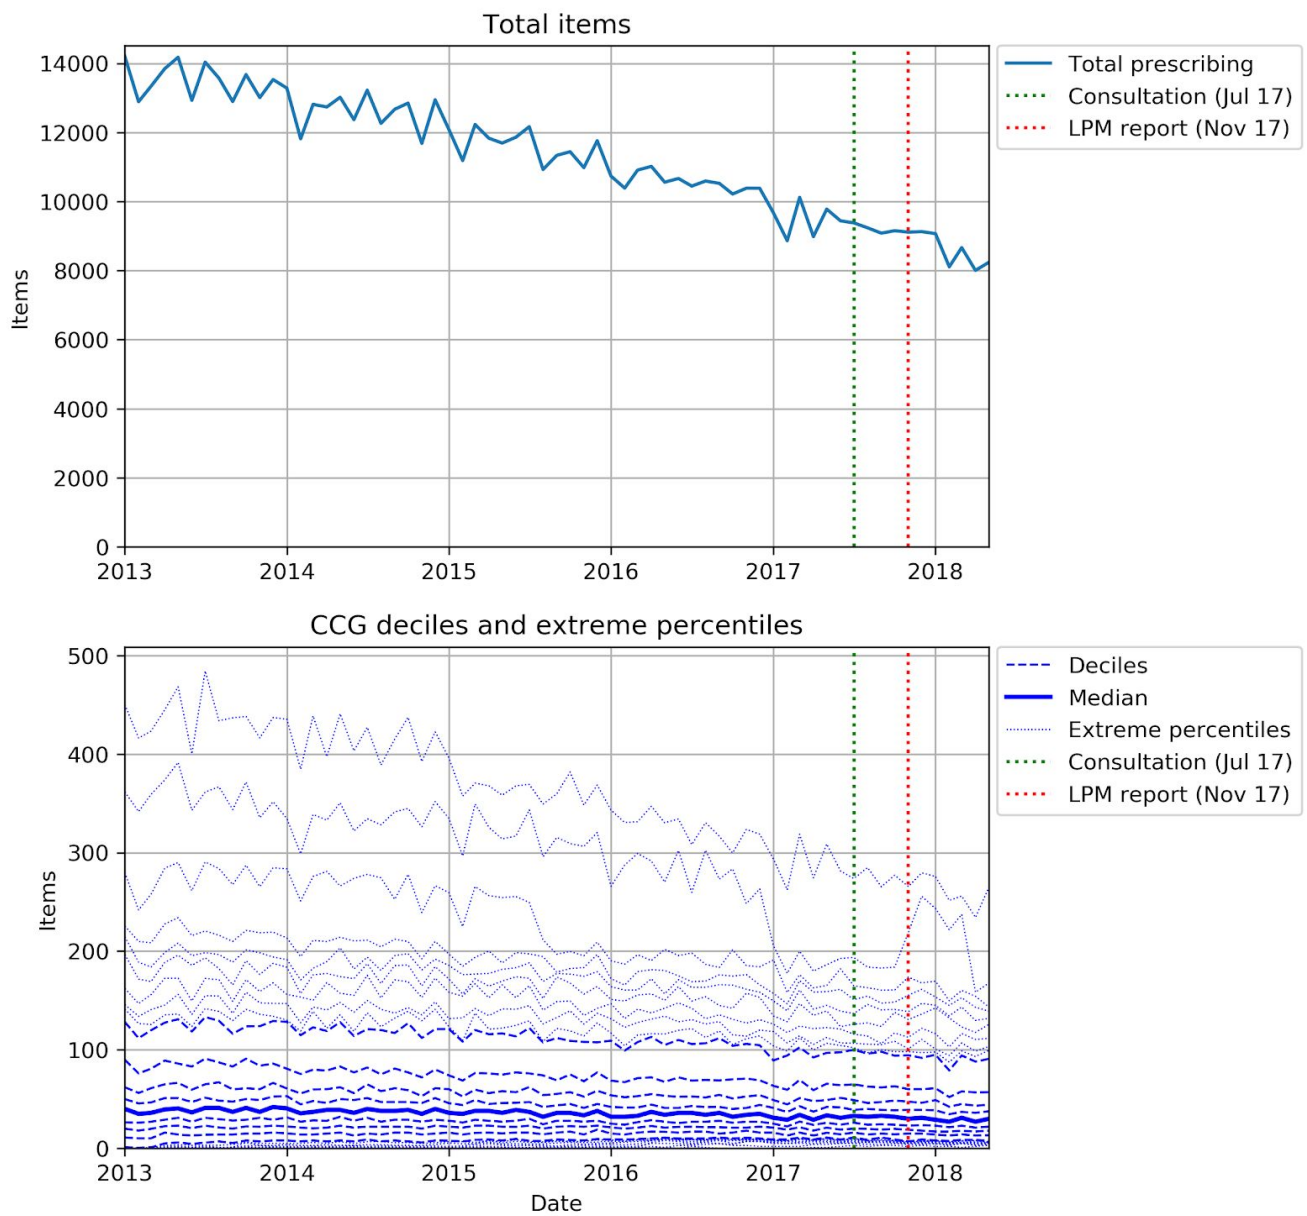

## [14] Rubefaciens items in England

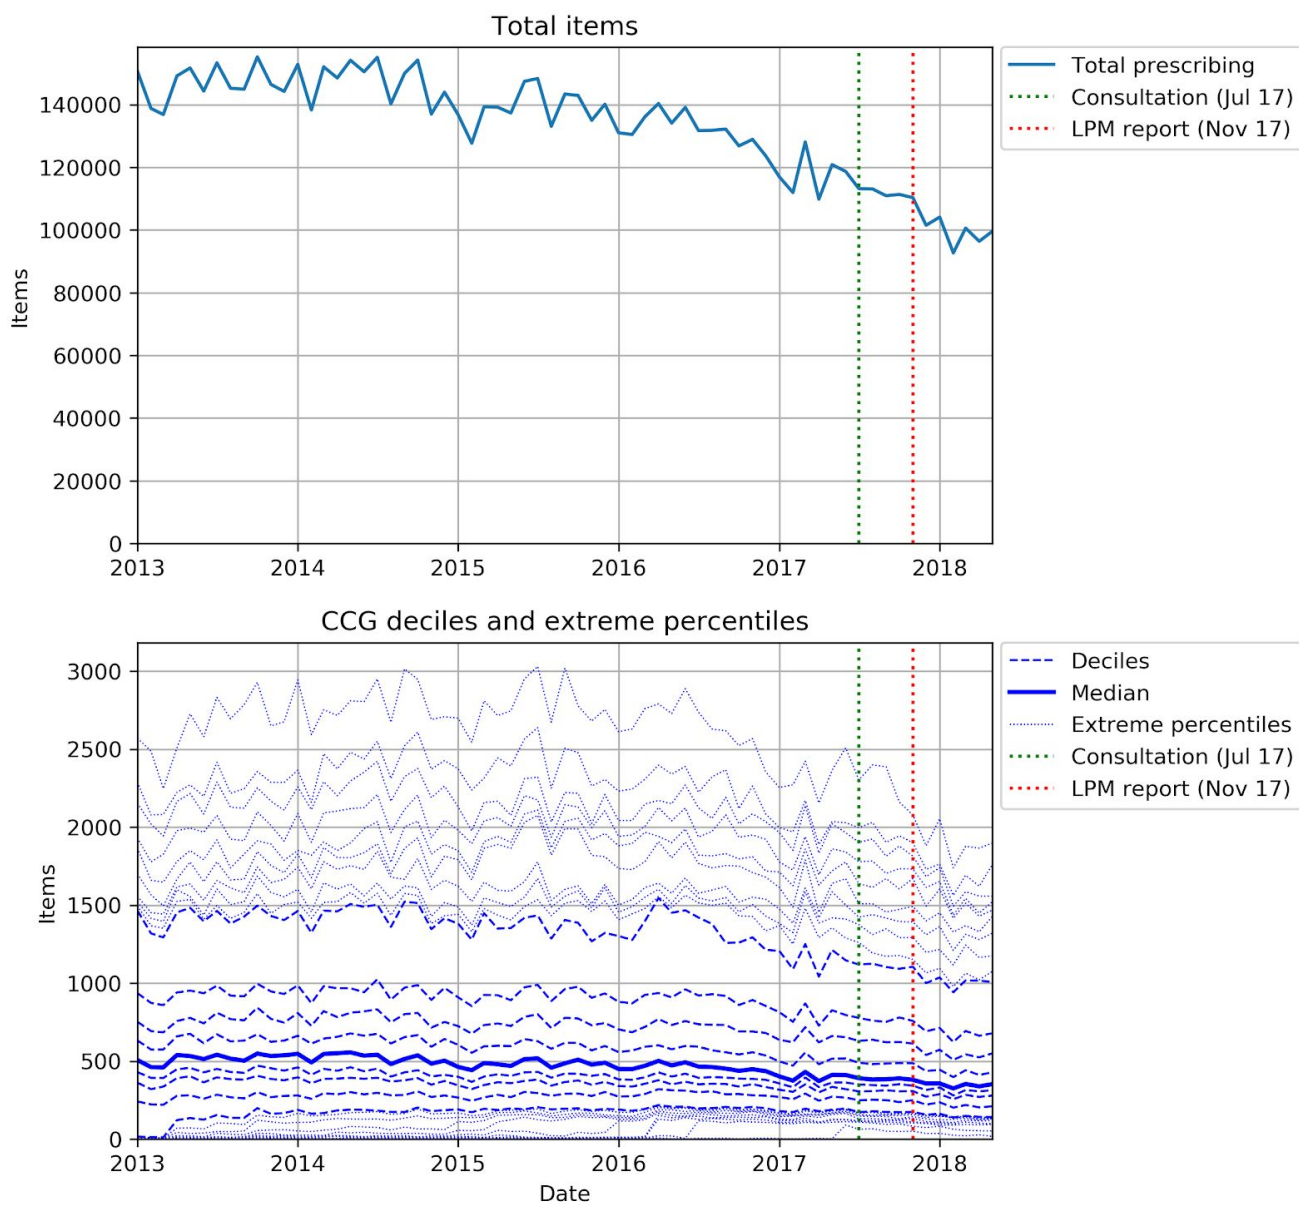

## [15] Tadalafil once daily items in England

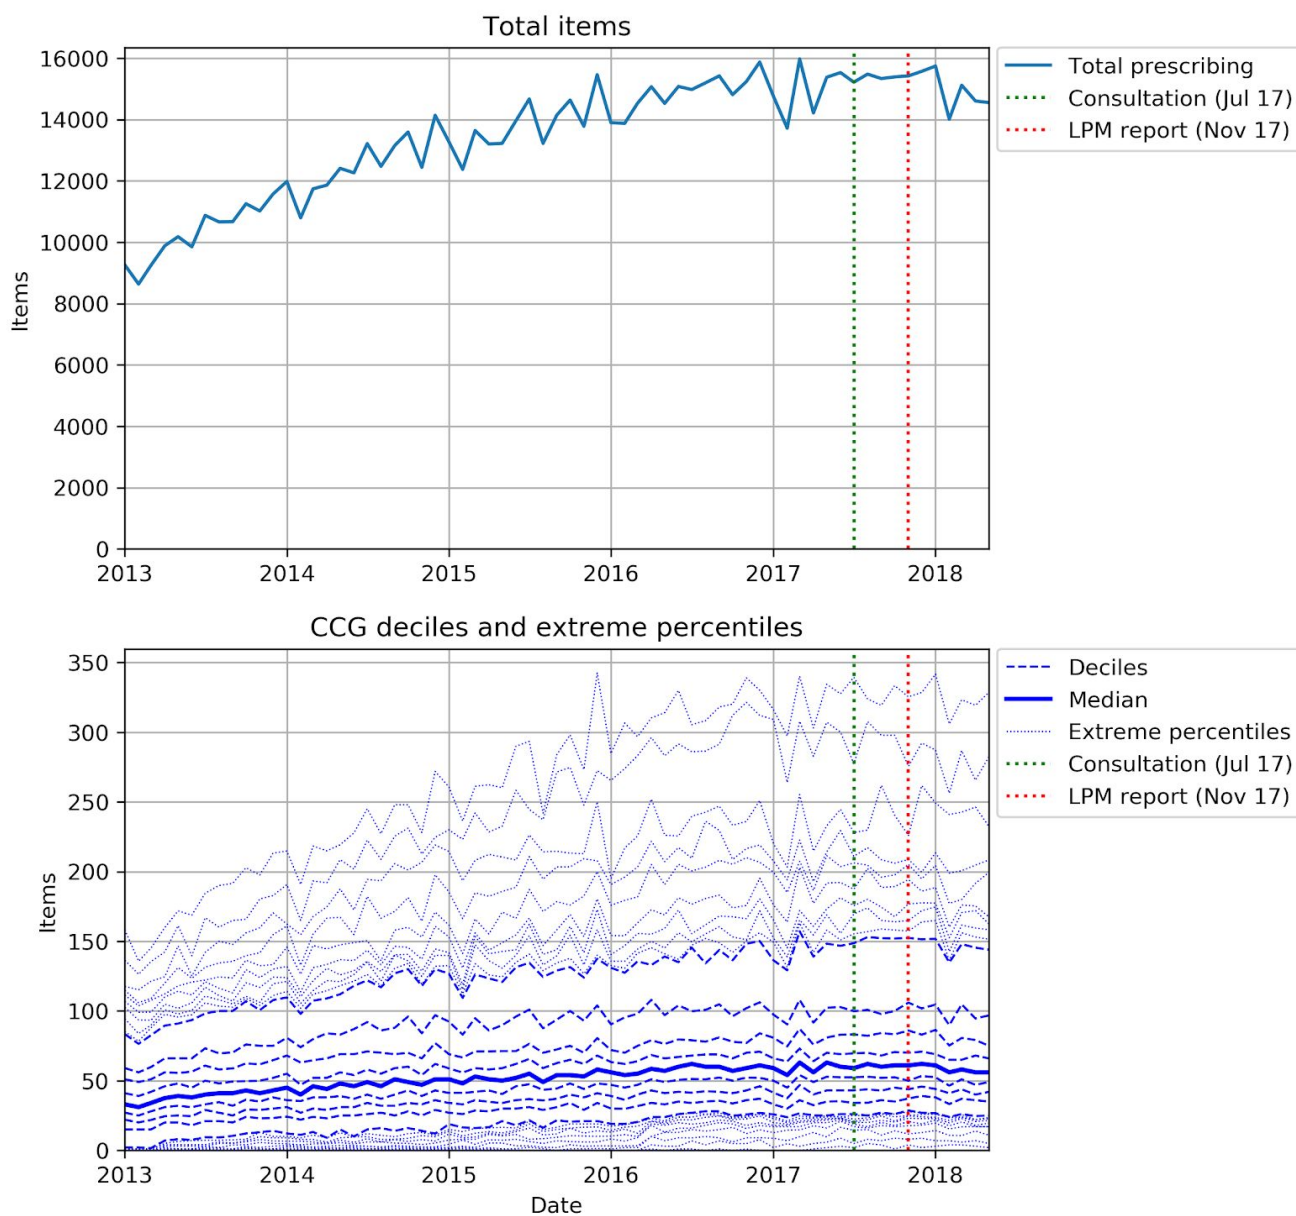

## [16] Paracetamol and tramadol combination items in England

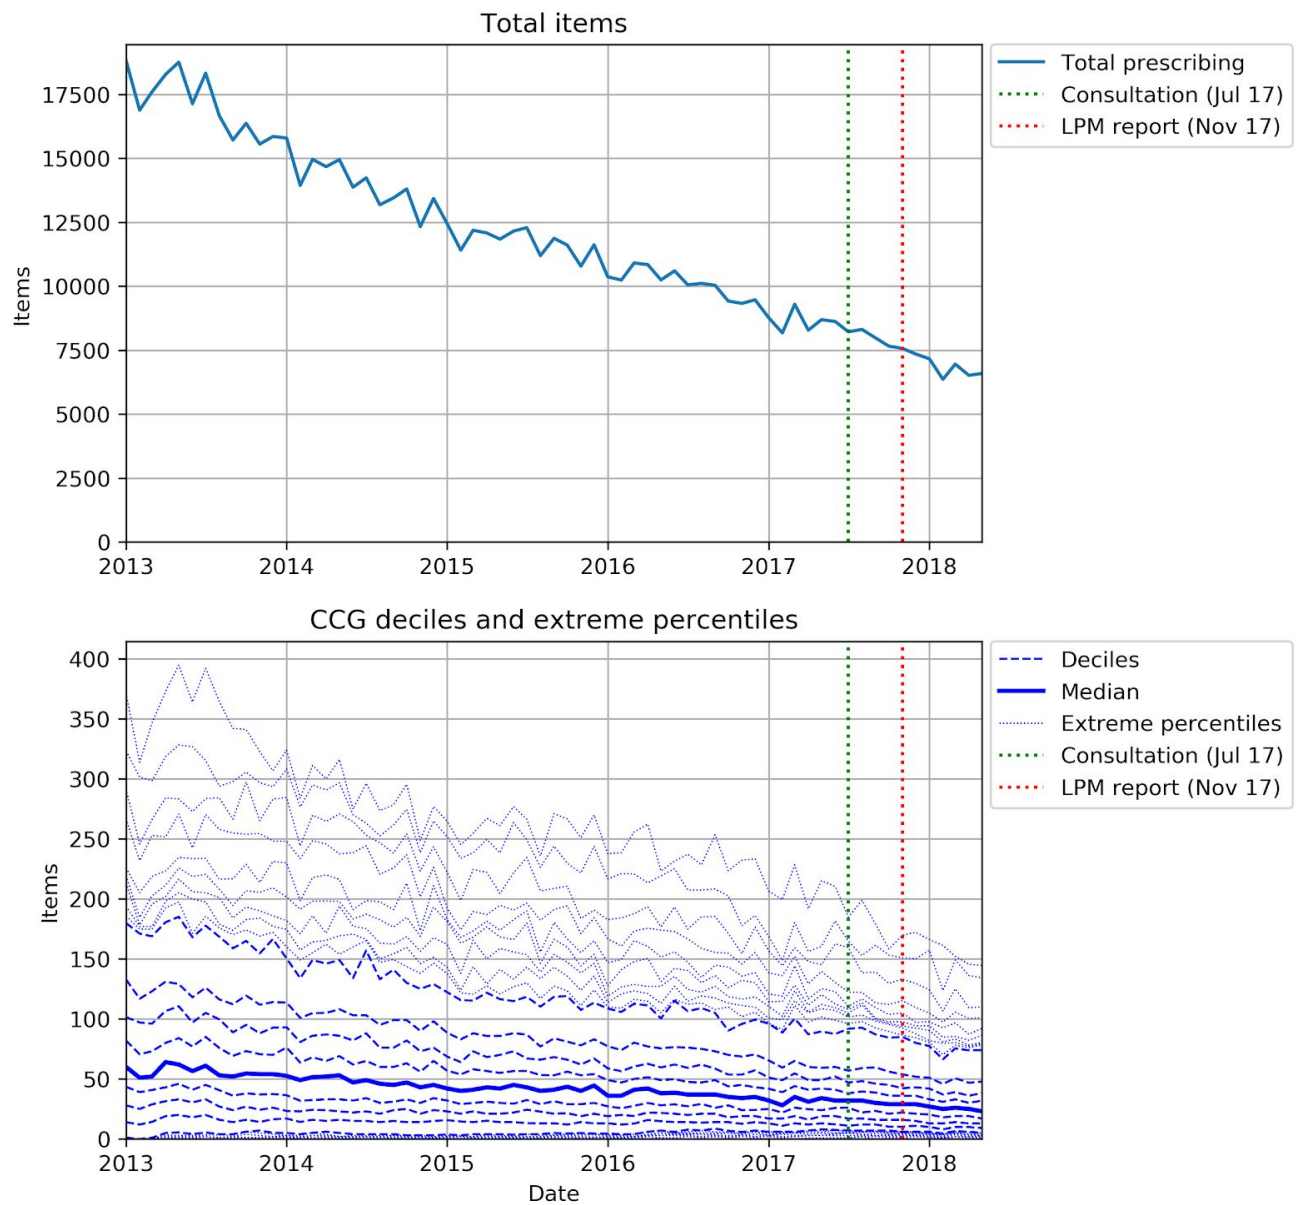

## [17] Travel vaccines items in England

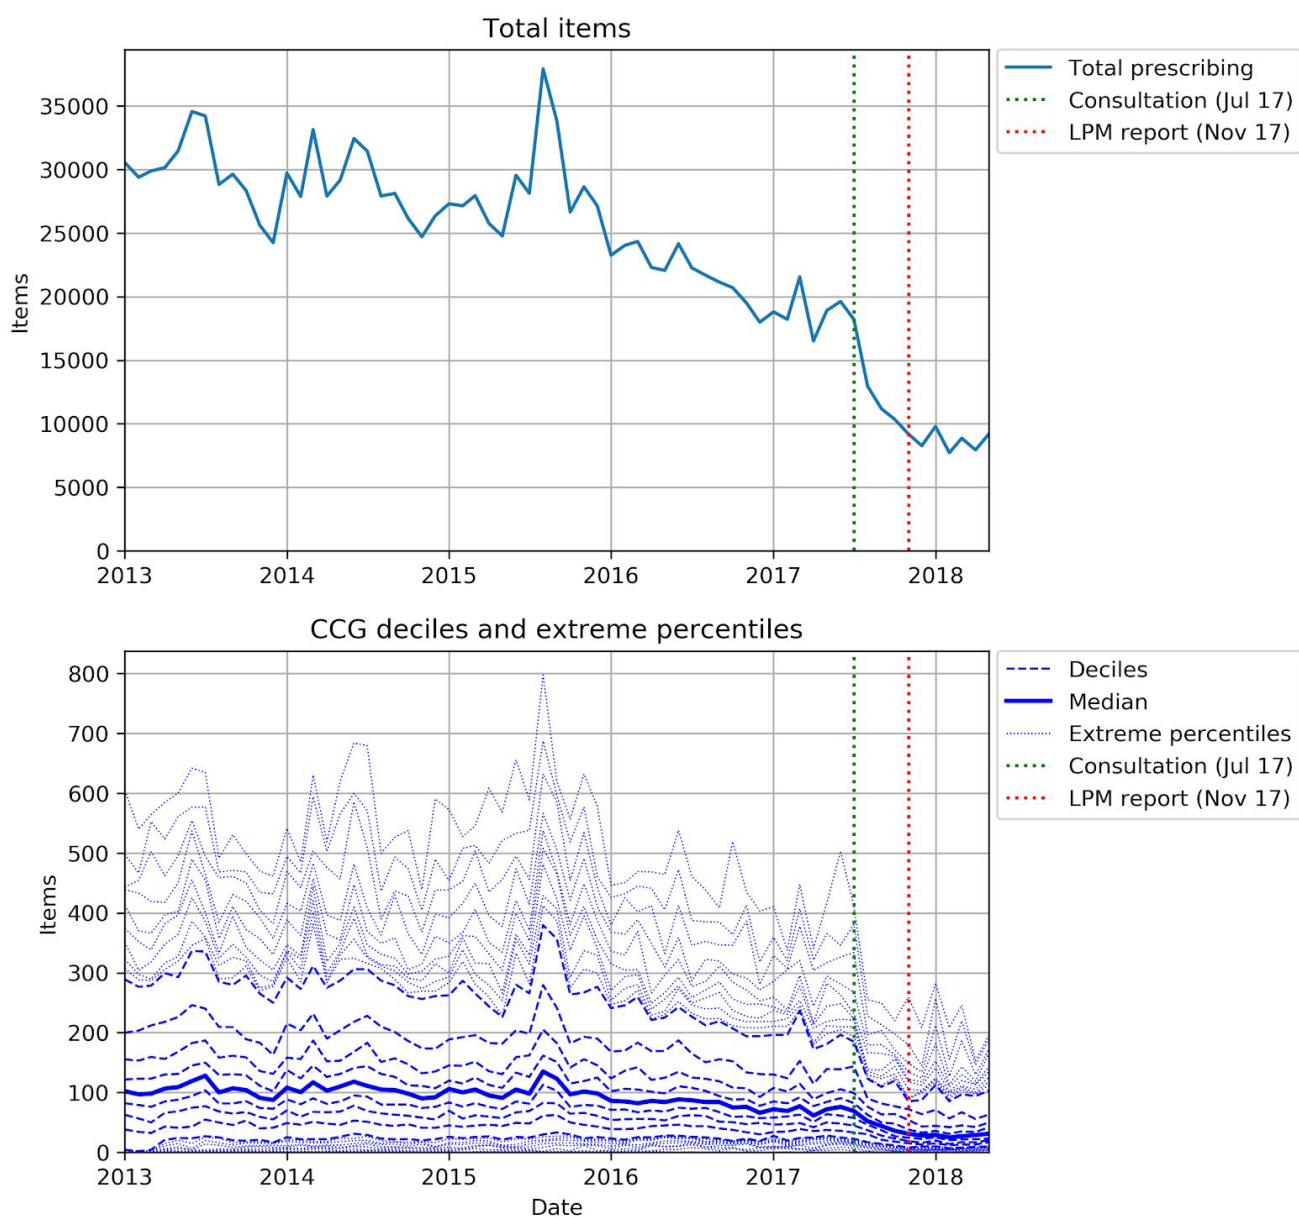

## [18] Trimipramine items in England

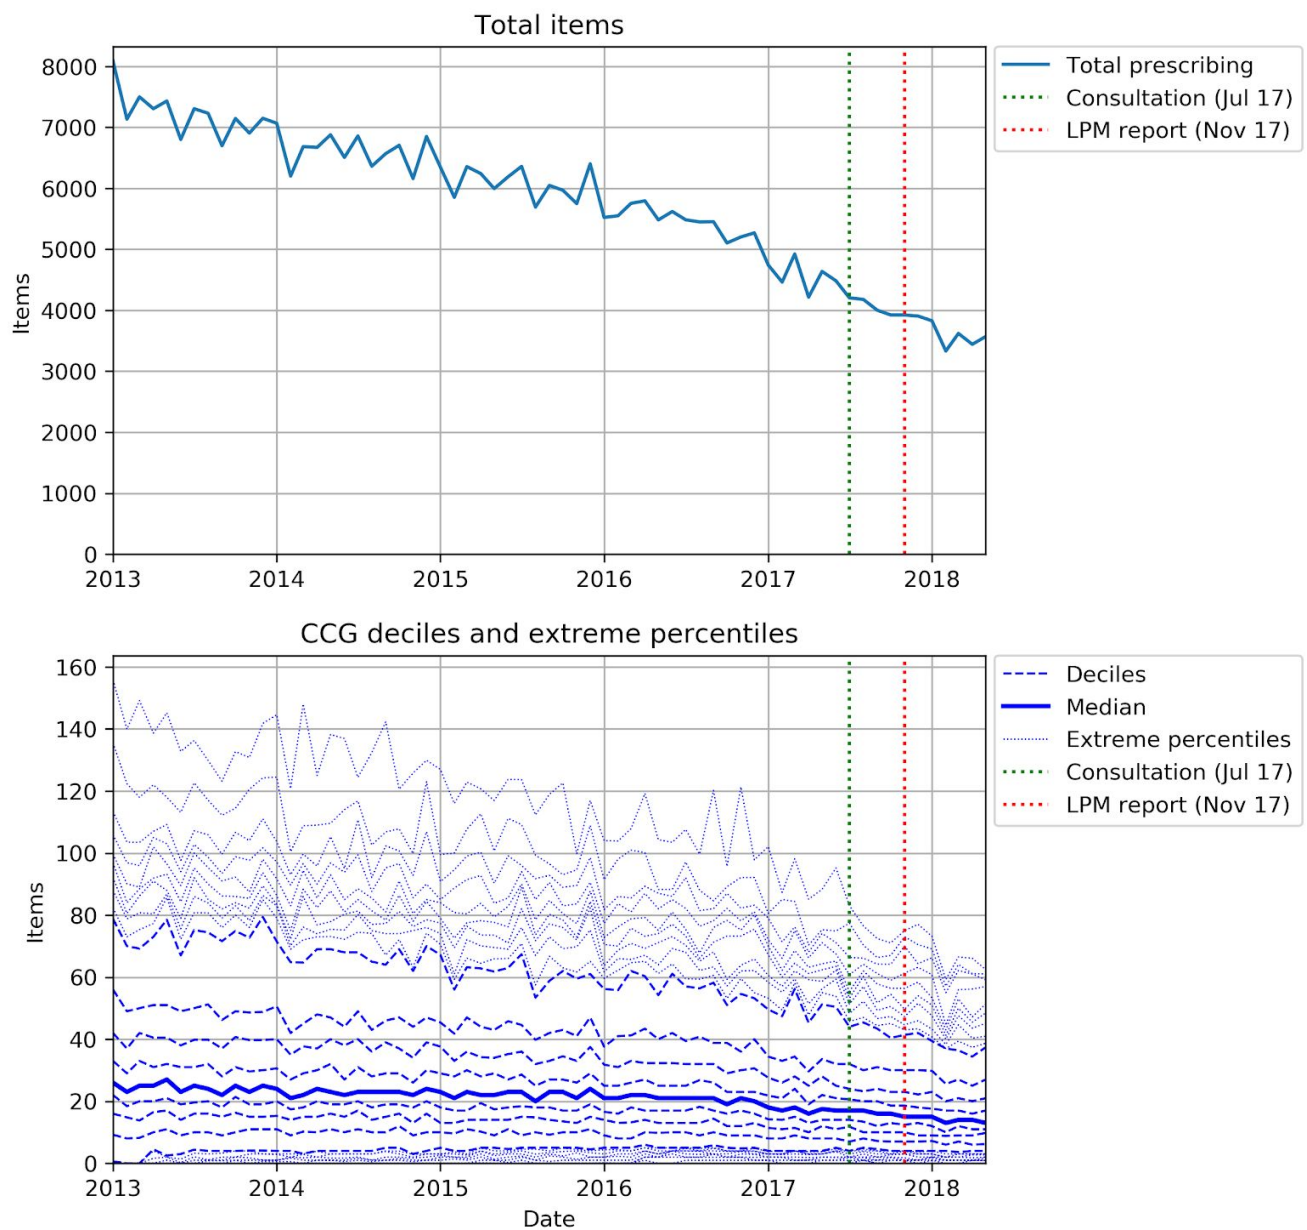

Supplement: Supplemental_material.pdf [file Supplemental_material.pdf]
